# Supplementary material for: Plant Insecticide L-Canavanine Repels Drosophila via the Insect Orphan GPCR DmX
Source: PubMed Central journal article supplement (PMC2695807; doi:10.1371/journal.pbio.1000147), 2009-06-30
Supplement: pbio.1000147.s005.pdf [file pbio.1000147.s005.pdf]

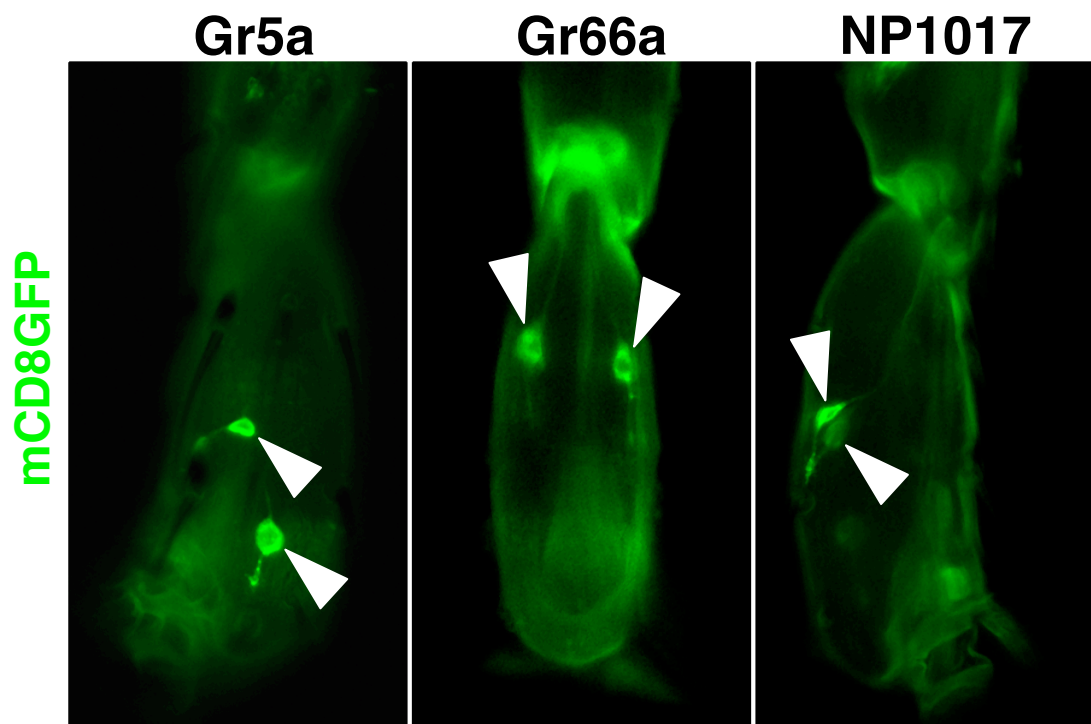

Figure S5
